# Supplementary material for: Illegal use of natural resources in federal protected areas of the Brazilian Amazon
Source: PeerJ. 2017 Oct 10;5:e3902. doi: 10.7717/peerj.3902 (PMC5639874; doi:10.7717/peerj.3902)
Supplement: Data S1 — Illegal activities dataset compiled and used in the study. [file peerj-05-3902-s007.xlsx]

## Sheet: PAs_illegal_activities
Name	PAclass	IUCN	Local	Ilegal_activities_2010	Ilegal_activities_2011	Ilegal_activities_2012	Ilegal_activities_2013	Ilegal_activities_2014	Ilegal_activities_2015	Ilegal_activities_total	hunting_total	fishing_total	vegetation_total	value_dollar	PAcreation	PAage	PAareakm2	PAperimeterkm	PAgroup	Population_density	Accessibility
APA_DO_IGARAPE_GELADO	Apa	V	Amazon	0	0	0	0	0	0	0	0	0	0	0	1989	26	232.851	149.251	Sustainable_Use	12.9106	1
APA_DO_TAPAJOS	Apa	V	Amazon	1	0	1	0	0	3	5	0	0	4	387703	2006	9	20400	3087.84	Sustainable_Use	0.292842	0.172852
ARIE_JAVARI_BURITI	Arie	IV	Amazon	0	0	2	0	0	0	2	0	0	2	1274.29	1985	30	131.771	73.0945	Sustainable_Use	3.52631	0.692048
ARIE_PROJETO_DINAMICA_BIOLOGICA_DE_FRAGMENTOS_FLORESTAIS	Arie	IV	Amazon	0	0	0	0	0	0	0	0	0	0	0	1985	30	31.8005	69.4385	Sustainable_Use	3.30261	1
ARIE_SERINGAL_NOVA_ESPERANCA	Arie	IV	Amazon	0	3	1	0	0	0	4	0	0	2	12424.3	1999	16	25.7398	22.3234	Sustainable_Use	8.34366	1
ESEC_DA_TERRA_DO_MEIO	Esec	Ia	Amazon	5	16	2	1	6	13	43	2	19	15	2.63176e+07	2005	10	33730	1419.2	Strictly_Protected	0.159628	0.210659
ESEC_DE_CARACARAI	Esec	Ia	Amazon	6	2	2	0	2	1	13	2	5	6	25208	1982	33	867.949	162.825	Strictly_Protected	1.26804	0.729364
ESEC_DE_CUNIA	Esec	Ia	Amazon	10	7	12	8	0	0	37	6	13	9	215438	2001	14	1853.14	356.946	Strictly_Protected	17.9316	0.526964
ESEC_DE_JUTAI_SOLIMOES	Esec	Ia	Amazon	3	13	3	6	1	0	26	10	13	3	18303.6	1983	32	2895.14	353.166	Strictly_Protected	2.36138	0.212134
ESEC_DE_MARACA	Esec	Ia	Amazon	19	28	3	8	24	10	92	6	52	0	49092.1	1981	34	1035.2	217.331	Strictly_Protected	0.760784	0.851206
ESEC_DE_MARACA_JIPIOCA	Esec	Ia	Coastal_marine	0	9	0	0	0	1	10	0	10	0	81395.3	1981	34	602.535	145.756	Strictly_Protected	1.41166	0.998672
ESEC_DO_JARI	Esec	Ia	Amazon	1	5	0	0	2	0	8	5	2	0	332940	1982	33	2310.82	433.397	Strictly_Protected	2.02522	0.311679
ESEC_JUAMI_JAPURA	Esec	Ia	Amazon	1	11	1	0	0	0	13	8	4	0	771137	2001	14	8315.32	574.809	Strictly_Protected	0.200141	0.0798847
ESEC_NIQUIA	Esec	Ia	Amazon	6	2	3	0	3	1	15	2	10	0	38738.5	Area	30	2847.91	347.204	Strictly_Protected	0.552015	0.165481
ESEC_RIO_ACRE	Esec	Ia	Amazon	0	0	0	0	0	0	0	0	0	0	0	1981	34	790.942	140.377	Strictly_Protected	0.297234	0.374589
FLONA_DE_ALTAMIRA	Flona	VI	Amazon	0	0	10	0	3	1	14	0	0	14	7.93711e+06	1998	17	7249.74	479.092	Sustainable_Use	0.233569	0.192641
FLONA_DE_ANAUA	Flona	VI	Amazon	2	2	3	0	1	0	8	1	0	5	107996	2005	10	2594.03	391.315	Sustainable_Use	0.99262	0.337138
FLONA_DE_BALATA_TUFARI	Flona	VI	Amazon	3	8	11	1	1	2	26	4	14	7	452807	2002	13	10800	1180.56	Sustainable_Use	2.28173	0.0802424
FLONA_DE_CARAJAS	Flona	VI	Amazon	20	0	10	7	2	1	40	15	9	8	4.93005e+06	1998	17	3912.63	397.745	Sustainable_Use	10.2215	0.666419
FLONA_DE_CAXIUANA	Flona	VI	Amazon	9	1	0	0	0	3	13	1	6	6	684232	1961	54	3179.51	297.167	Sustainable_Use	3.12396	0.3209
FLONA_DE_HUMAITA	Flona	VI	Amazon	21	13	11	17	12	2	76	6	13	8	79968.1	1998	17	4731.59	430.354	Sustainable_Use	1.65602	0.152961
FLONA_DE_ITAITUBA_I	Flona	VI	Amazon	0	0	0	0	4	2	6	0	0	2	9812.04	1998	17	2128.92	628.182	Sustainable_Use	0.29839	0.331692
FLONA_DE_ITAITUBA_II	Flona	VI	Amazon	0	0	26	0	15	12	53	1	0	47	8.67346e+06	1998	17	3977.56	2471.38	Sustainable_Use	3.80516	0.763597
FLONA_DE_JACUNDA	Flona	VI	Amazon	15	27	2	3	0	8	55	0	3	38	1.15508e+06	2004	11	2212.2	388.752	Sustainable_Use	1.23867	0.119343
FLONA_DE_MULATA	Flona	VI	Amazon	0	0	0	3	2	5	10	0	0	7	141860	2001	14	2166.04	370.056	Sustainable_Use	1.13195	0.121139
FLONA_DE_PAU_ROSA	Flona	VI	Amazon	3	11	4	0	5	5	28	13	4	9	352788	2001	14	9881.87	1000.14	Sustainable_Use	0.783941	0.365838
FLONA_DE_RORAIMA	Flona	VI	Amazon	4	6	0	9	8	4	31	10	2	17	83306.8	1989	26	1696.29	297.047	Sustainable_Use	0.73116	0.588335
FLONA_DE_SANTA_ROSA_DO_PURUS	Flona	VI	Amazon	0	1	1	0	0	0	2	0	0	2	216247	2001	14	2315.57	430.164	Sustainable_Use	0.322807	0.348028
FLONA_DE_SAO_FRANCISCO	Flona	VI	Amazon	0	0	0	0	0	0	0	0	0	0	0	2001	14	211.478	83.0298	Sustainable_Use	0.184154	0
FLONA_DE_SARACA_TAQUERA	Flona	VI	Amazon	4	32	6	7	6	3	58	7	0	49	1.64001e+06	1989	26	4412.88	436.697	Sustainable_Use	5.5495	0.504895
FLONA_DE_TEFE	Flona	VI	Amazon	16	10	10	6	3	13	58	35	8	13	2.33835e+06	1989	26	8651.27	757.551	Sustainable_Use	2.52333	0.155232
FLONA_DO_AMANA	Flona	VI	Amazon	1	0	0	1	0	0	2	0	0	2	11150	2006	9	6825.61	474.995	Sustainable_Use	0.248721	0.0987463
FLONA_DO_AMAPA	Flona	VI	Amazon	5	9	10	9	7	2	42	8	17	3	150513	1989	26	4603.59	409.297	Sustainable_Use	1.66785	0.180725
FLONA_DO_AMAZONAS	Flona	VI	Amazon	0	0	0	0	0	0	0	0	0	0	0	1989	26	19440	2204.54	Sustainable_Use	0.313784	0.143487
FLONA_DO_BOM_FUTURO	Flona	VI	Amazon	14	30	0	0	1	1	46	1	0	20	629011	1988	27	973.853	307.576	Sustainable_Use	21.7514	0.135771
FLONA_DO_CREPORI	Flona	VI	Amazon	10	0	0	0	0	0	10	0	0	7	455878	2006	9	7403.96	626.409	Sustainable_Use	0.451036	0.0181572
FLONA_DO_IQUIRI	Flona	VI	Amazon	6	8	2	3	0	9	28	17	1	10	3.24612e+06	2008	7	14730	1270.63	Sustainable_Use	0.70998	0.236781
FLONA_DO_ITACAIUNAS	Flona	VI	Amazon	6	10	7	5	0	1	29	1	1	15	1.37834e+06	1998	17	1367.01	276.638	Sustainable_Use	1.10569	0.717407
FLONA_DO_JAMANXIM	Flona	VI	Amazon	0	1	3	40	17	36	97	5	2	61	1.17859e+07	2006	9	13020	855.656	Sustainable_Use	1.04731	0.648395
FLONA_DO_JAMARI	Flona	VI	Amazon	17	6	6	11	4	8	52	1	0	12	241910	1984	31	2221.57	229.217	Sustainable_Use	6.21548	0.903615
FLONA_DO_JATUARANA	Flona	VI	Amazon	0	1	1	0	0	0	2	0	0	1	63714.6	2002	13	5694.28	439.402	Sustainable_Use	0.605058	0.189462
FLONA_DO_MACAUA	Flona	VI	Amazon	0	0	0	0	0	0	0	0	0	0	0	1988	27	1763.47	301.596	Sustainable_Use	0.18511	0
FLONA_DO_PURUS	Flona	VI	Amazon	2	9	7	5	1	4	28	6	9	12	614659	1988	27	2561.23	376.741	Sustainable_Use	1.38891	0.126423
FLONA_DO_TAPAJOS	Flona	VI	Amazon	2	10	0	2	4	4	22	1	2	15	241510	1974	41	5306.21	546.203	Sustainable_Use	12.5151	0.528646
FLONA_DO_TAPIRAPE_AQUIRI	Flona	VI	Amazon	1	1	1	0	0	2	5	0	1	2	681746	1989	26	1965.06	323.152	Sustainable_Use	1.86822	0.472677
FLONA_DO_TRAIRAO	Flona	VI	Amazon	4	36	6	7	4	2	59	13	0	39	6.87464e+06	2006	9	2575.29	425.236	Sustainable_Use	1.95556	0.794186
FLONA_MAPIA_INAUINI	Flona	VI	Amazon	0	1	0	0	0	0	1	1	0	0	2548.58	1989	26	3689.5	537.554	Sustainable_Use	1.08124	0
PARNA_DA_AMAZONIA	Parna	II	Amazon	31	11	5	4	5	15	71	3	1	52	1.92097e+06	1974	41	10660	1803.47	Strictly_Protected	3.27717	0.257236
PARNA_DA_SERRA_DO_DIVISOR	Parna	II	Amazon	19	69	48	21	28	14	199	72	0	109	1.63931e+06	1989	26	8375.6	830.793	Strictly_Protected	2.55093	0.0917647
PARNA_DA_SERRA_DO_PARDO	Parna	II	Amazon	7	1	0	0	3	8	19	4	7	7	2.91528e+06	2005	10	4454.13	316.8	Strictly_Protected	0.870789	0.136953
PARNA_DE_ANAVILHANAS	Parna	II	Amazon	30	21	16	11	9	3	90	22	14	47	3.65734e+06	1981	34	3502.43	445.682	Strictly_Protected	75.902	0.609654
PARNA_DE_PACAAS_NOVOS	Parna	II	Amazon	0	0	0	0	0	0	0	0	0	0	0	1979	36	7086.7	608.978	Strictly_Protected	4.85696	0.242087
PARNA_DO_CABO_ORANGE	Parna	II	Coastal_marine	3	15	40	53	0	11	122	1	120	0	837765	1980	35	6573.28	512.898	Strictly_Protected	2.13757	0.729874
PARNA_DO_JAMANXIM	Parna	II	Amazon	14	10	8	0	8	22	62	3	0	40	4.18931e+07	2006	9	8598.07	743.991	Strictly_Protected	0.426595	0.505141
PARNA_DO_JAU	Parna	II	Amazon	2	7	0	2	0	5	16	14	2	0	207530	1980	35	23670	1158.79	Strictly_Protected	0.121539	0.0957381
PARNA_DO_JURUENA	Parna	II	Amazon	31	6	5	3	7	18	70	0	16	31	1.95406e+06	2006	9	19580	1298.68	Strictly_Protected	0.220008	0.329063
PARNA_DO_MONTE_RORAIMA	Parna	II	Amazon	2	2	2	0	5	0	11	0	0	0	5575.02	1989	26	1167.49	314.387	Strictly_Protected	1.03509	0
PARNA_DO_PICO_DA_NEBLINA	Parna	II	Amazon	3	4	2	3	2	0	14	2	2	3	23886	1979	36	22530	973.851	Strictly_Protected	1.23129	0.165351
PARNA_DO_RIO_NOVO	Parna	II	Amazon	0	0	0	0	0	0	0	0	0	0	0	2006	9	5381.57	735.678	Strictly_Protected	0.163529	0.198937
PARNA_DO_VIRUA	Parna	II	Amazon	0	0	3	0	1	0	4	0	4	0	907.932	1998	17	2149.51	238.982	Strictly_Protected	0.702899	0.658211
PARNA_DOS_CAMPOS_AMAZONICOS	Parna	II	Amazon	7	23	12	26	0	0	68	3	12	48	1.73254e+06	2006	9	9613.27	1072.98	Strictly_Protected	0.794949	0.426729
PARNA_MAPINGUARI	Parna	II	Amazon	13	44	25	21	15	69	187	28	20	92	1.0721e+07	2008	7	17770	1940.96	Strictly_Protected	8.76379	0.107439
PARNA_MONTANHAS_DO_TUMUCUMAQUE	Parna	II	Amazon	5	5	1	4	0	0	15	5	3	3	18126.8	2002	13	38650	1715.93	Strictly_Protected	0.500021	0.224841
PARNA_NASCENTES_DO_LAGO_JARI	Parna	II	Amazon	3	1	2	2	0	2	10	2	1	6	443612	2008	7	8127.53	563.767	Strictly_Protected	0.605387	0.250025
PARNA_SERRA_DA_CUTIA	Parna	II	Amazon	0	0	0	0	0	0	0	0	0	0	0	2001	14	2835.03	344.053	Strictly_Protected	0.495984	0
PARNA_SERRA_DA_MOCIDADE	Parna	II	Amazon	0	0	0	0	0	1	1	0	1	0	0	1998	17	3599.44	403.193	Strictly_Protected	0.134191	0.0135502
REBIO_DE_UATUMA	Rebio	Ia	Amazon	38	2	0	0	0	0	40	8	7	17	2.82488e+06	1990	25	9387.32	532.558	Strictly_Protected	0.336535	0.18753
REBIO_DO_ABUFARI	Rebio	Ia	Amazon	57	35	62	55	44	63	316	141	168	0	5.03022e+06	1982	33	2238.67	289.707	Strictly_Protected	0.734645	0.640233
REBIO_DO_GUAPORE	Rebio	Ia	Amazon	34	3	1	11	20	5	74	7	50	7	102606	1982	33	6157.76	518.625	Strictly_Protected	2.75739	0.154019
REBIO_DO_GURUPI	Rebio	Ia	Amazon	20	23	22	14	25	33	137	24	1	94	2.39949e+07	1988	27	2712.01	324.871	Strictly_Protected	6.24305	0.959962
REBIO_DO_JARU	Rebio	Ia	Amazon	36	33	42	18	9	20	158	10	89	55	1.15368e+06	1979	36	3468.64	358.386	Strictly_Protected	2.64798	0.327627
REBIO_DO_LAGO_PIRATUBA	Rebio	Ia	Coastal_marine	3	1	18	8	0	3	33	3	27	2	223708	1980	35	3924.75	308.326	Strictly_Protected	3.06022	0.409975
REBIO_DO_RIO_TROMBETAS	Rebio	Ia	Amazon	45	16	10	13	24	14	122	46	39	27	1.82326e+06	1979	36	4077.59	342.707	Strictly_Protected	0.736925	0.400788
REBIO_DO_TAPIRAPE	Rebio	Ia	Amazon	8	1	2	0	2	0	13	1	1	11	577941	1989	26	992.73	286.142	Strictly_Protected	2.45922	0.645573
REBIO_NASCENTES_DA_SERRA_DO_CACHIMBO	Rebio	Ia	Amazon	0	9	1	0	13	47	70	3	3	49	1.37266e+07	2005	10	3421.96	318.18	Strictly_Protected	0.585672	0.914103
RDS_DE_ITATUPA_BAQUIA	Rds	VI	Amazon	0	0	0	3	0	0	3	2	1	0	10882.4	2005	10	644.422	116.194	Sustainable_Use	3.04565	0.690312
RESEX_ARAPIXI	Resex	VI	Amazon	2	4	0	1	1	0	8	0	3	4	16741.6	2006	9	1337.12	251.222	Sustainable_Use	1.83124	0.671753
RESEX_ARIOCA_PRUANA	Resex	VI	Amazon	3	1	0	5	2	0	11	0	0	10	5.31427e+06	2005	10	838.167	154.151	Sustainable_Use	13.4018	0.805749
RESEX_AUATI_PARANA	Resex	VI	Amazon	0	2	2	3	2	1	10	3	4	2	9716.47	2001	14	1469.49	275.355	Sustainable_Use	1.56352	0.000139045
RESEX_BARREIRO_DAS_ANTAS	Resex	VI	Amazon	1	0	0	0	0	0	1	0	0	0	1592.86	2001	14	1061.99	205.147	Sustainable_Use	0.266377	0
RESEX_CHICO_MENDES	Resex	VI	Amazon	1	29	13	33	10	7	93	4	8	71	2.81899e+06	1990	25	9315.43	1102.94	Sustainable_Use	14.8372	0.29141
RESEX_CHOCOARE_MATO_GROSSO	Resex	VI	Coastal_marine	2	9	2	0	7	0	20	1	16	2	85743.9	2002	13	27.832	62.5746	Sustainable_Use	45.7874	1
RESEX_DE_CURURUPU	Resex	VI	Coastal_marine	2	2	3	8	1	0	16	1	15	0	16992.7	2004	11	1860.57	605.667	Sustainable_Use	20.772	0.999274
RESEX_DE_SAO_JOAO_DA_PONTA	Resex	VI	Coastal_marine	6	39	3	0	0	0	48	1	44	0	352795	2002	13	34.0949	124.576	Sustainable_Use	57.7561	1
RESEX_DO_ALTO_JURUA	Resex	VI	Amazon	11	1	0	0	1	2	15	2	0	12	1.02071e+06	1990	25	5379.49	451.058	Sustainable_Use	1.26945	0.227136
RESEX_DO_ALTO_TARAUACA	Resex	VI	Amazon		16	5	2	0	0	23	5	3	15	777509	2000	15	1509.24	282.892	Sustainable_Use	0.738026	0.569419
RESEX_DO_BAIXO_JURUA	Resex	VI	Amazon	10	17	10	2	0	5	44	22	17	4	362983	2001	14	1780.39	292.302	Sustainable_Use	0.482402	0.332016
RESEX_DO_CAZUMBA_IRACEMA	Resex	VI	Amazon	3	17	9	0	8	0	37	13	0	24	530328	2002	13	7549.87	605.237	Sustainable_Use	1.51028	0.0483398
RESEX_DO_CIRIACO	Resex	VI	Amazon	6	4	1	4	3	4	22	3	1	10	247028	1992	23	81.0663	53.8821	Sustainable_Use	48.8719	1
RESEX_DO_LAGO_DO_CAPANA_GRANDE	Resex	VI	Amazon	1	3	4	3	0	3	14	7	5	2	23593.5	2004	11	3043.13	391.739	Sustainable_Use	1.39812	0.270741
RESEX_DO_LAGO_DO_CUNIA	Resex	VI	Amazon	4	4	2	0	0	0	10	0	9	0	8665.18	1999	16	506.043	140.326	Sustainable_Use	28.4484	0.744638
RESEX_DO_MEDIO_JURUA	Resex	VI	Amazon	4	0	0	0	0	8	12	8	4	0	85517.7	1997	18	2869.55	388.643	Sustainable_Use	1.14408	0.441458
RESEX_DO_MEDIO_PURUS	Resex	VI	Amazon	22	7	2	0	5		36	17	7	11	138745	2008	7	6042.36	1157.3	Sustainable_Use	1.18767	0.650558
RESEX_DO_QUILOMBO_FLEXAL	Resex	VI	Amazon	5	0	1	9	0	2	17	5	0	5	25008	1992	23	93.3845	45.2927	Sustainable_Use	19.4863	1
RESEX_DO_RIO_CAJARI	Resex	VI	Amazon	16	21	0	2	3		42	2	1	28	1.35855e+06	1990	25	5324.05	366.857	Sustainable_Use	3.92939	0.394686
RESEX_DO_RIO_DO_CAUTARIO	Resex	VI	Amazon	0	0	0	0	0	2	2	0	2	0	3185.73	2001	14	751.255	209.078	Sustainable_Use	1.17055	0.00888598
RESEX_DO_RIO_JUTAI	Resex	VI	Amazon	5	6	5	3	0	13	32	14	4	3	164312	2002	13	2755.16	421.755	Sustainable_Use	0.862395	0.515839
RESEX_DO_RIO_OURO_PRETO	Resex	VI	Amazon	4	18	7	0	0	0	29	0	17	12	160599	1990	25	2046.33	425.684	Sustainable_Use	3.32113	0.47631
RESEX_GURUPA_MELGACO	Resex	VI	Amazon	3	1	3	4	0	0	11	0	0	10	728913	2006	9	1455.74	223.29	Sustainable_Use	3.39098	0.162321
RESEX_IPAU_ANILZINHO	Resex	VI	Amazon	4	1	1	0	8	4	18	1	0	16	968984	2005	10	558.35	117.174	Sustainable_Use	7.15857	1
RESEX_ITUXI	Resex	VI	Amazon	0	3	0	1	0	0	4	1	0	3	7065.94	2008	7	7763.3	637.515	Sustainable_Use	0.201174	0.228039
RESEX_MAE_GRANDE_DE_CURUCA	Resex	VI	Coastal_marine	16	40	2	0	2	0	60	1	47	8	224720	2002	13	366.788	437.571	Sustainable_Use	62.5637	0.999283
RESEX_MAPUA	Resex	VI	Amazon	0	0	0	0	0	0	0	0	0	0	0	2005	10	937.477	233.153	Sustainable_Use	4.14373	0
RESEX_MARACANA	Resex	VI	Coastal_marine	4	23	2	2	17	0	48	4	31	4	41274.3	2002	13	301.796	577.11	Sustainable_Use	47.5932	1
RESEX_MARINHA_DE_ARAI_PEROBA	Resex	VI	Coastal_marine	0	0	3	0	0	0	3	0	3	0	0	2005	10	625.781	231.959	Sustainable_Use	36.3978	1
RESEX_MARINHA_DE_CAETE_TAPERACU	Resex	VI	Coastal_marine	17	14	8	0	2	1	42	11	19	4	120658	2005	10	424.898	164.683	Sustainable_Use	47.4557	1
RESEX_MARINHA_DE_GURUPI_PIRIA	Resex	VI	Coastal_marine	3	2	0	2	0	2	9	0	3	1	12902.2	2005	10	727.899	328.032	Sustainable_Use	31.7148	1
RESEX_MARINHA_DE_SOURE	Resex	VI	Coastal_marine	8	29	25	39	20	8	129	2	33	10	181567	2001	14	295.788	283.552	Sustainable_Use	19.4562	1
RESEX_MARINHA_DE_TRACUATEUA	Resex	VI	Coastal_marine	0	3	0	0	0	4	7	0	4	3	7476.9	2005	10	278.645	145.106	Sustainable_Use	52.2824	1
RESEX_RENASCER	Resex	VI	Amazon	11	4	0	1	2	2	20	1	3	13	2.56438e+06	2009	6	2096.67	234.968	Sustainable_Use	3.02305	0.120173
RESEX_RIO_IRIRI	Resex	VI	Amazon	3	2	3	1	0	1	10	1	7	1	15399.8	2006	9	3989.98	544.761	Sustainable_Use	0.217011	0.635364
RESEX_RIO_UNINI	Resex	VI	Amazon	0	0	0	0	0	0	0	0	0	0	0	2006	9	8496.93	1232.45	Sustainable_Use	0.368705	0.538825
RESEX_RIO_XINGU	Resex	VI	Amazon	3	0	7	22	4	0	36	11	14	7	693055	2008	7	3030.05	374.683	Sustainable_Use	0.0610384	0.670081
RESEX_RIOZINHO_DA_LIBERDADE	Resex	VI	Amazon	16	14	9	1	8	0	48	14	1	27	74474	2005	10	3249.06	399.033	Sustainable_Use	1.56538	0.0625889
RESEX_RIOZINHO_DO_ANFRISIO	Resex	VI	Amazon	0	19	1	8	0	3	31	3	0	19	4.76375e+06	2004	11	7361.44	496.194	Sustainable_Use	1.51095	0.0763796
RESEX_TAPAJOS_ARAPIUNS	Resex	VI	Amazon	10	0	0	3	10	18	41	7	2	26	133801	1998	17	6775.21	600.011	Sustainable_Use	11.0645	0.0814965
RESEX_TERRA_GRANDE_PRACUUBA	Resex	VI	Amazon	0	2	2	4	0	4	12	1	3	7	109589	2006	9	1948.7	272.814	Sustainable_Use	9.60429	0
RESEX_VERDE_PARA_SEMPRE	Resex	VI	Amazon	9	16	9	29	0	15	78	12	21	39	1.67819e+06	2004	11	12890	559.114	Sustainable_Use	2.62726	0.185087

## Sheet: notes
APA: Environmental Protected Area, ARIE: Area of Relevant Ecological Interest, ESEC: Ecological Reserve, PARNA: National Park, REBIO: Biological Reserve, FLONA: National Forest, RDS: Sustainable Development Reserve, RESEX: Extractive Reserve.
